# Supplementary material
Source: publisher figshare collection journal article supplement (https://tandf.figshare.com/articles/dataset/_/11806509)
Supplement: Supplementary file 6 [file 1]

Archive with 11 entries (11 files):
- Suppl. Fig. 1.pdf
- Suppl. Fig. 2.pdf
- Suppl. Fig. 3.pdf
- Suppl. Fig. 4.pdf
- Suppl. Fig. 5.pdf
- Suppl. Fig. 6.pdf
- Suppl. Fig. 7.pdf
- Suppl. Fig. 8.pdf
- Supplementary Figures caption.docx
- Table S1.png
- Table S2.docx
