# Supplementary material
Source: publisher figshare collection journal article supplement (https://tandf.figshare.com/articles/dataset/_/11806509)
Supplement: Supplementary file 6 [file 1 › Suppl. Fig. 4.pdf]

A

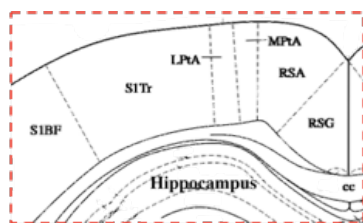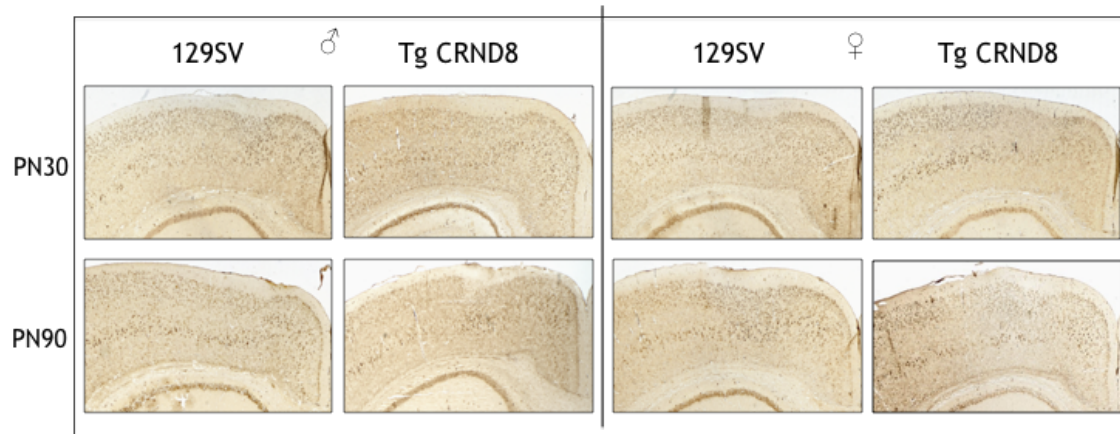

B

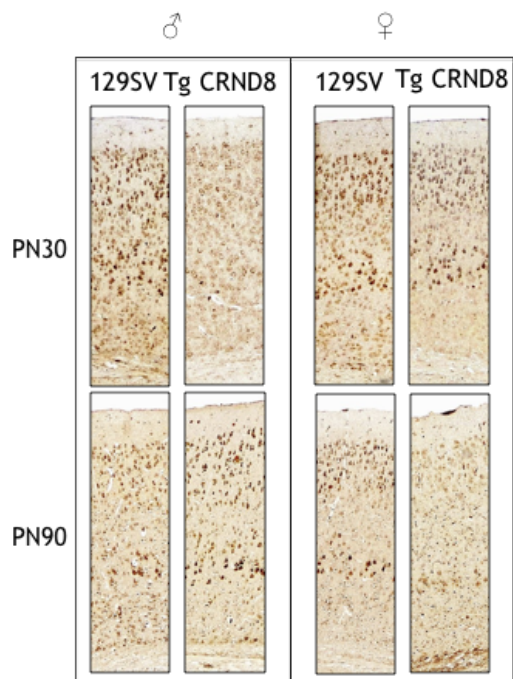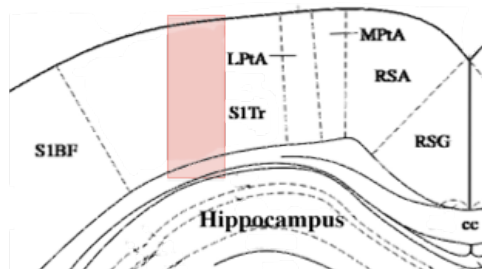

C

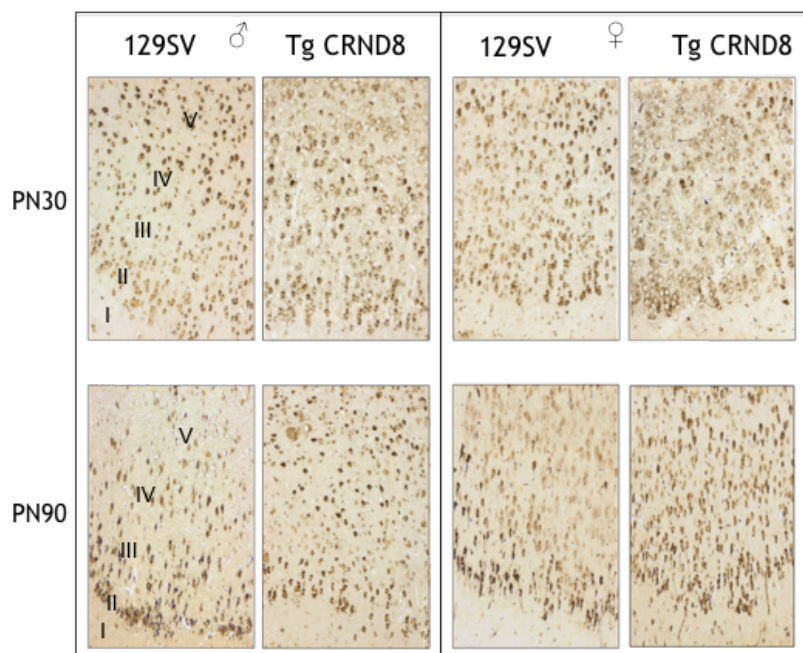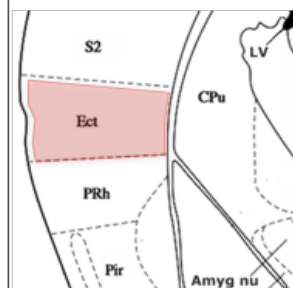

Amyg nu amygdaloid nuclei  
 Ect ectorhinal cortex  
 Pir piriform cortex  
 PRh perirhinal cortex  
 Cpu caudate putamen (striatum)  
 LV lateral ventricle  
 S2 secondary somatosensory cortex
