# Supplementary material
Source: publisher figshare collection journal article supplement (https://tandf.figshare.com/articles/dataset/_/11806509)
Supplement: Supplementary file 6 [file 1 › Supplementary Figures caption.docx]

**Supplementary Figures**

**Figure S1: PCA for methylation in ED14.5 brain.**

The figure show the graph derived from the statistical analysis (PCA) performed on the methylation values obtained by the embryonic mouse brain.

**Figure S2: PCA for methylation in PN90 brain.**

The figure show the graph derived from the statistical analysis (PCA) performed on the methylation values obtained by the adult mouse brain. A) genotype factor; B) sex factor.

**Figure S3: PSEN1 immunostaining of embryonic day (E) 14.5 mouse embryos.**

N=10

**Figure S4: PSEN1 immunostaining of adult mouse brain.**

1. An overview of various fields of the cortex.
2. Higher magnification of the area outlined by the rectangle in the scheme (right).
3. Higher magnification of the area highlighted in the scheme (right).

N=6 per group.

**Figure S5: PCA for methylation in human embryonic and young brain.**

The figure show the graph derived from the statistical analysis (PCA) performed on the methylation values obtained by the embryonic (GW) and young (2 Months and 17 years) human brain.

**Figure S6: PCA for methylation in human adult brain and blood.**

The figure show the graph derived from the statistical analysis (PCA) performed on the methylation values obtained by the adult human brain (A) and blood (B).

**Figure S7: Comparison between Sanger and Pyrosequencing.**

Sequencing of 20 bp (cytosines 1162-1195) in two MA healthy controls (A and B) and in two AD I-II subjects (C and D) shows highly comparable methylation profiles: R= 0.95 and 0.90 respectively.

**Figure S8: Methylation profiles obtained by different bisulfite assays.**

PSEN1 methylation analysis performed using DNA modified by four different methods (Epitect Kit Qiagen, EZ-DNA methylation Kit Zymo-Research, custom Sodium Bisulfite, custom Ammonium Bisulfite) show comparable methylation patterns. Where only blue points are visible (e.g. when methylation is =0%) is since the points are coincident.

**Figure S9: Representative agarose gel of PCR products.**

Representative agarose gel related to PCR amplification of bisulfite-modified DNA from A) mice brain samples, B) human brain samples and C) human blood samples show that the PCR products used for cloning are not in saturation.
