# Supplementary material
Source: publisher figshare collection journal article supplement (https://tandf.figshare.com/articles/dataset/_/11806509)
Supplement: Supplementary file 6 [file 1 › Table S2.docx]

**Table S2.** Summary of Cases for MA and LOAD brain samples.

| Diagnosis | No. Cases | Age (Years): Mean (Range) | PMI Range |
| --- | --- | --- | --- |
| MA | 15 (6 female, 9 male) | 69.33 (57-81) | 2h15’ - 9h25’ |
| AD I-II/A | 15 (6 female, 9 male) | 71.05 (55-82) | 2h55’ - 9h45’ |
| AD IV-VI/C | 15 (7 female, 8 male) | 67.83 (52-85) | 2h45’ - 9h30’ |
