# Supplementary material
Source: publisher figshare collection journal article supplement (https://tandf.figshare.com/articles/dataset/_/11806509)

# PCA in human samples (embryos and young)

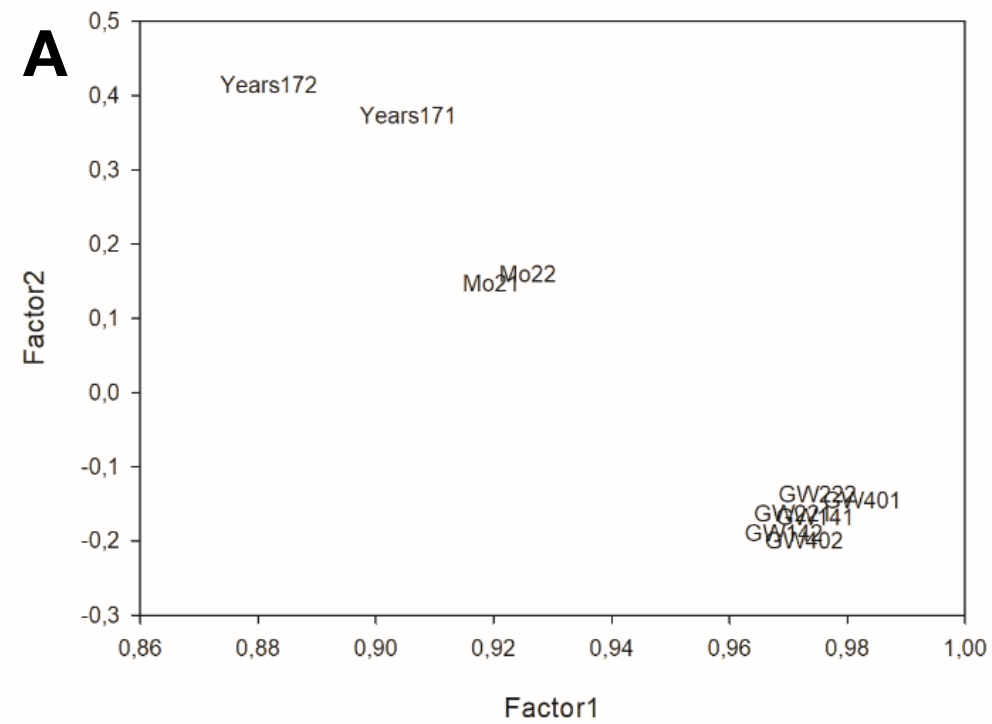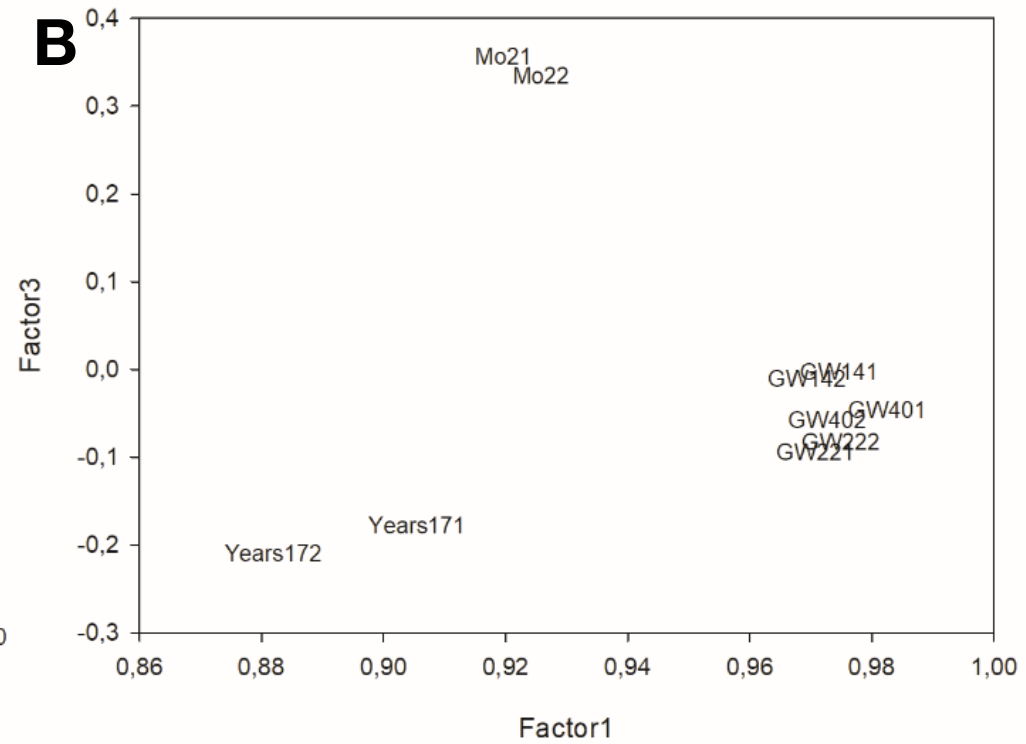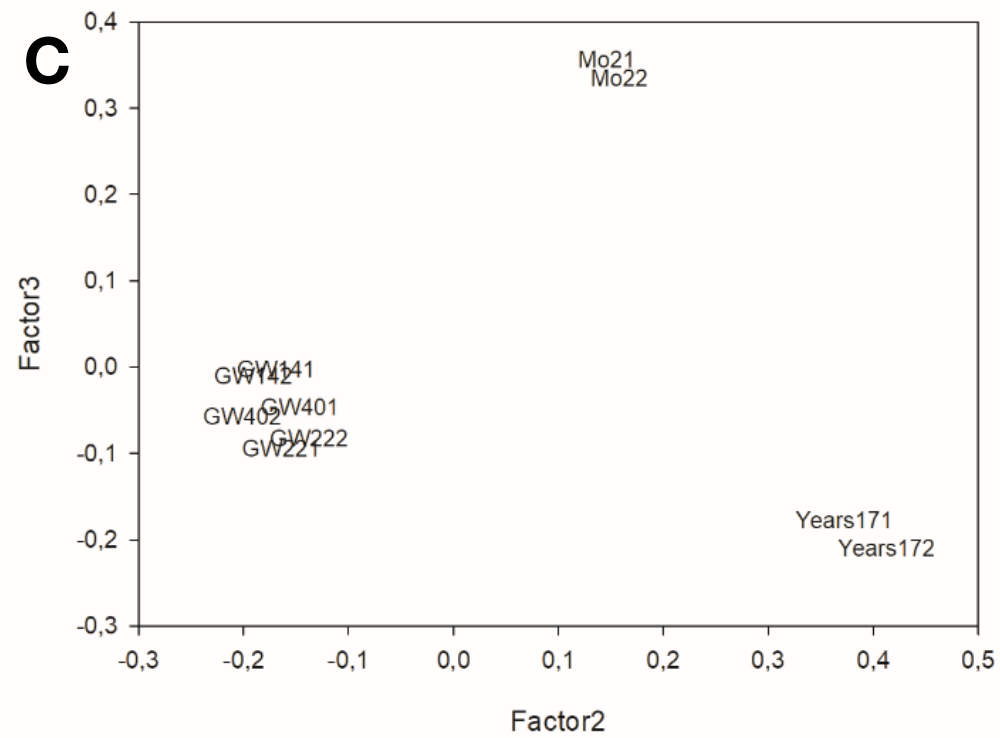

Supplement: Supplementary file 1 [file 1]

ED 14.5

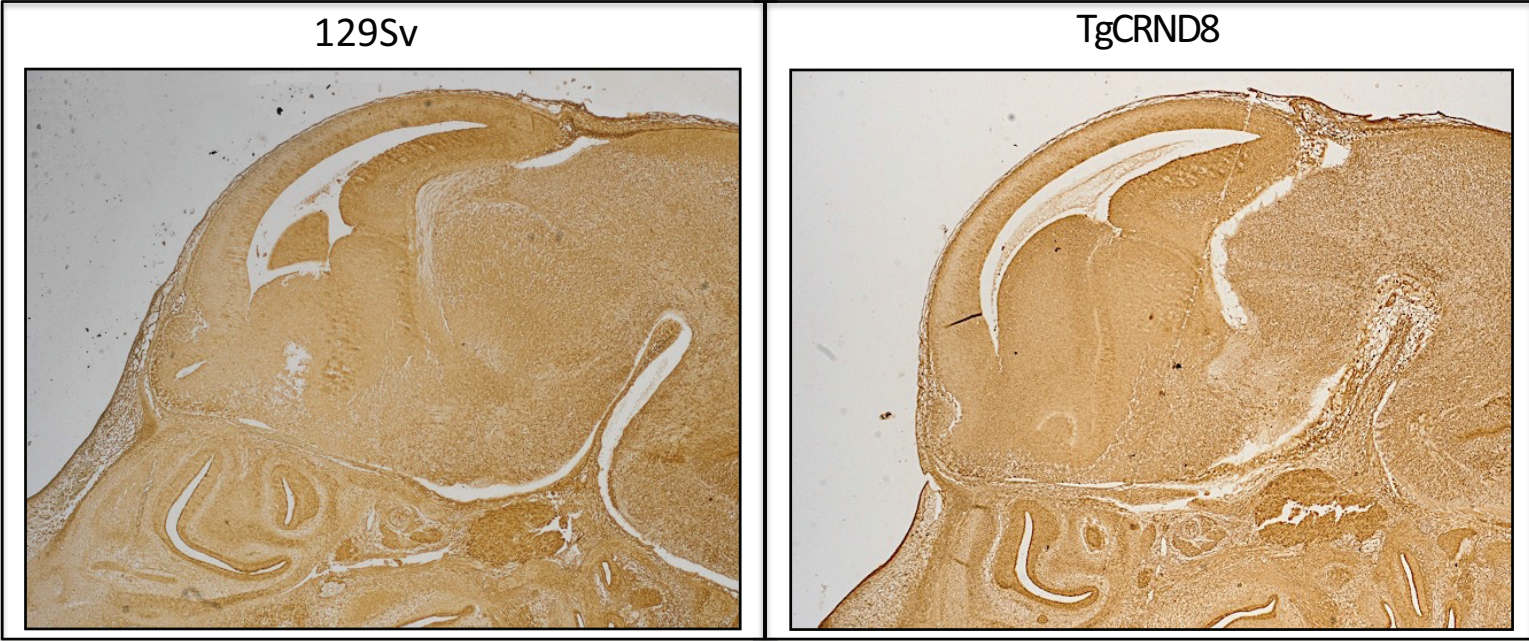

MC: MarginalZone  
NC: Neocortex

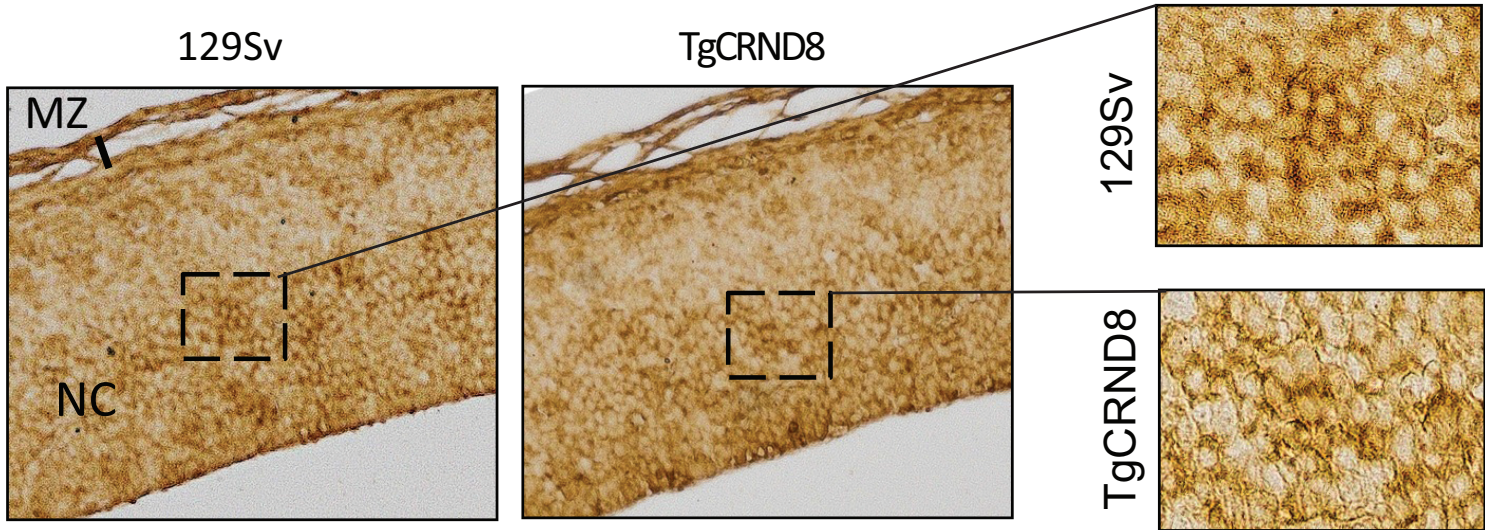

Supplement: Supplementary file 2 [file 1]

## PCA in human samples (Controls and AD)

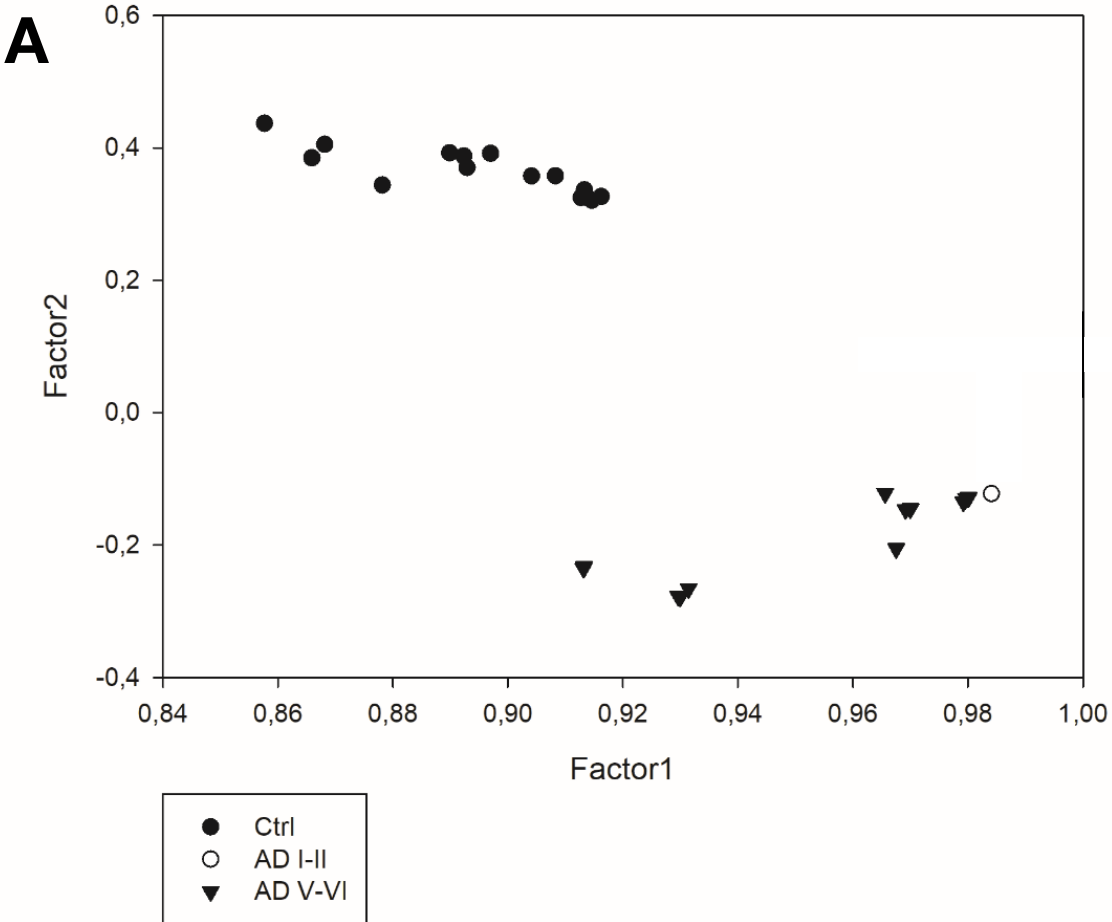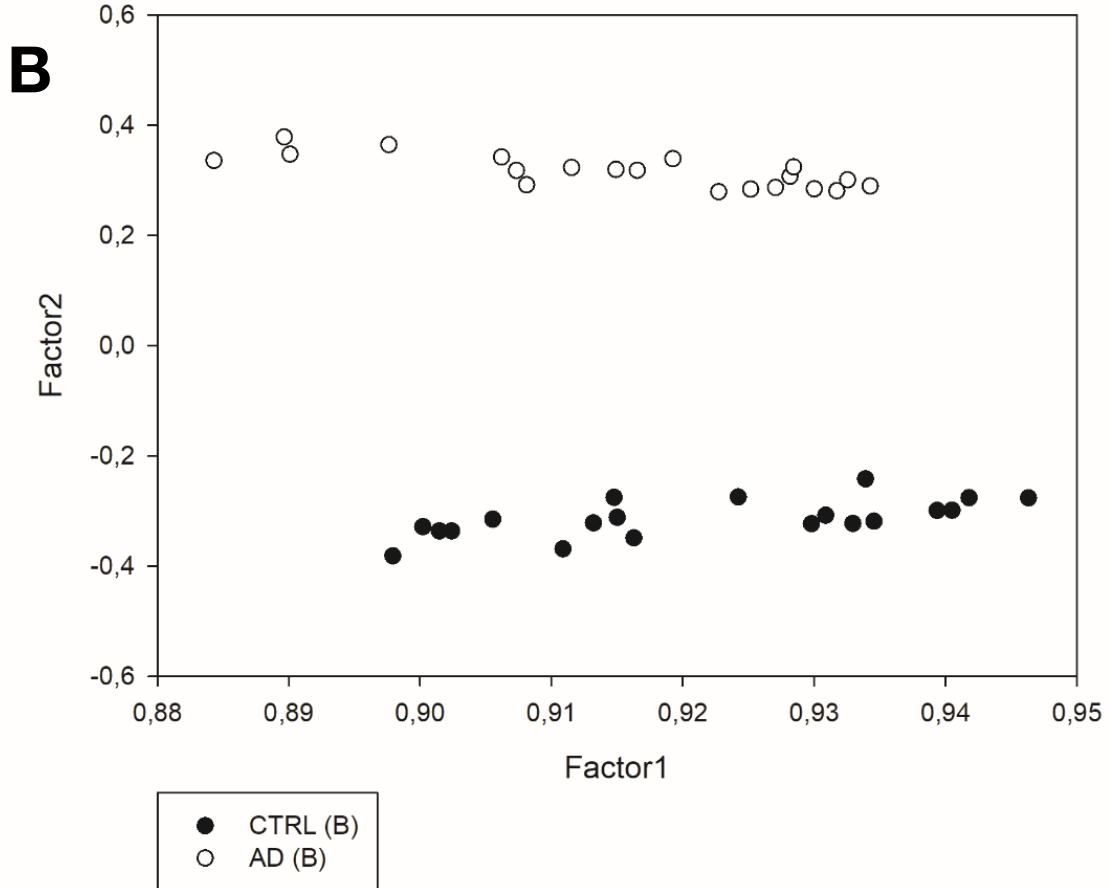

Supplement: Supplementary file 3 [file 1]

# PCA in mouse at PN9

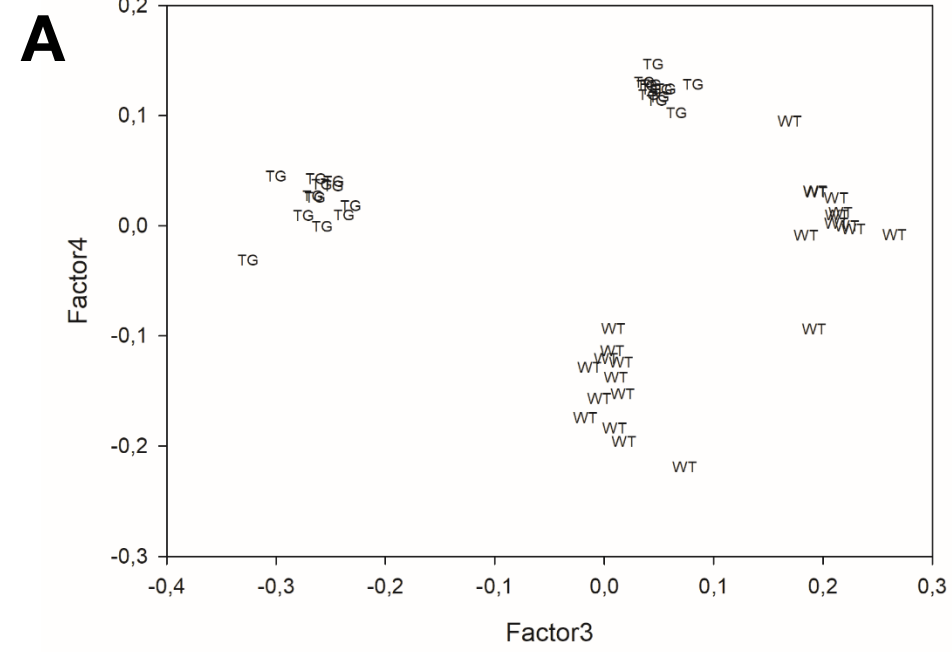

Supplement: Supplementary file 4 [file 1]

**A**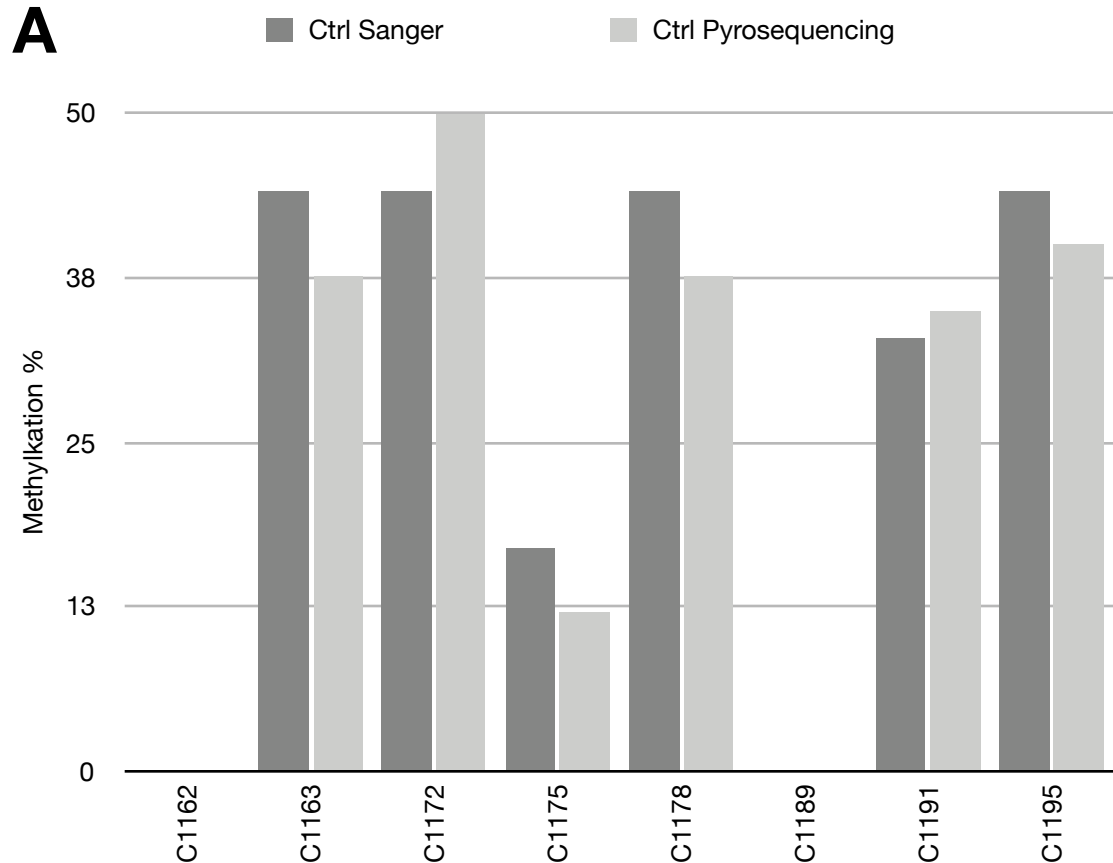**B**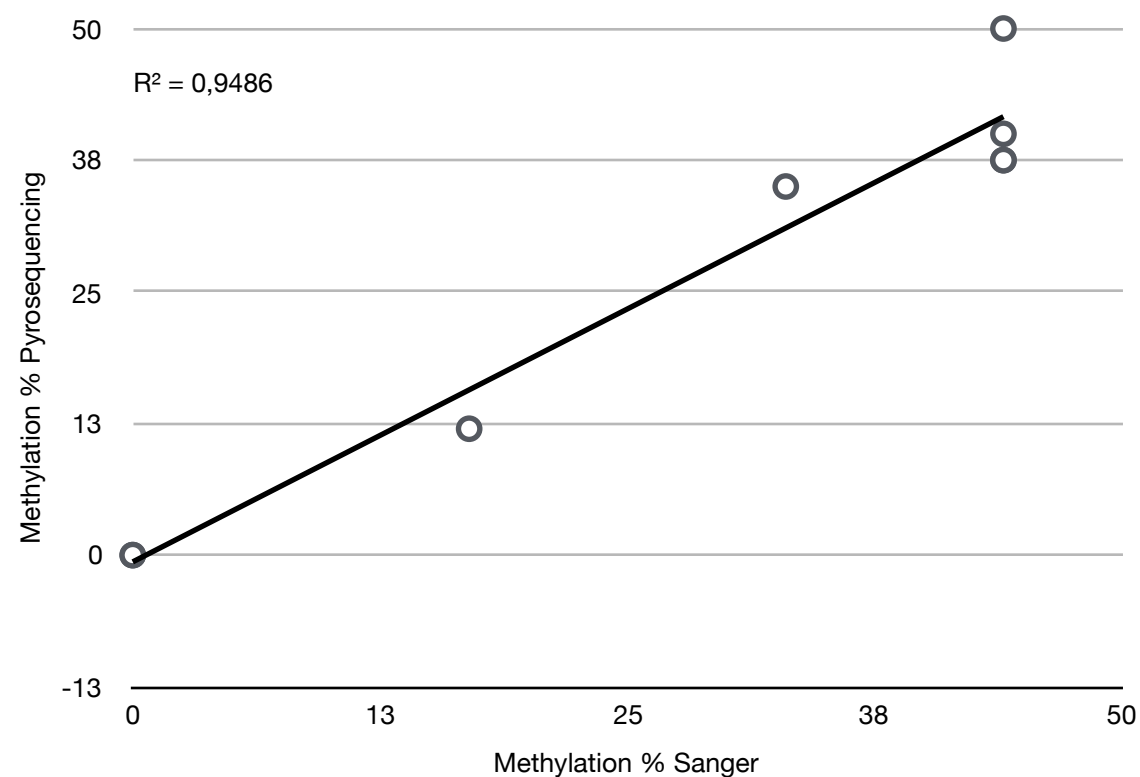**C**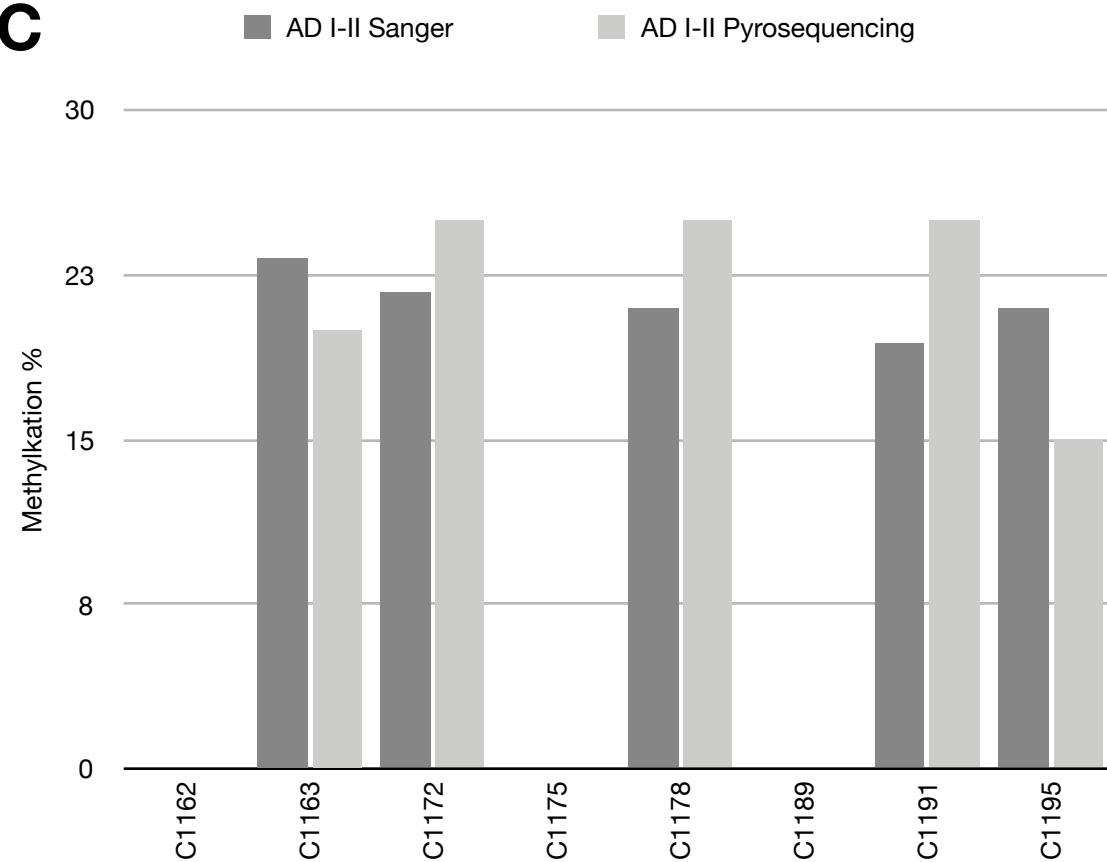**D**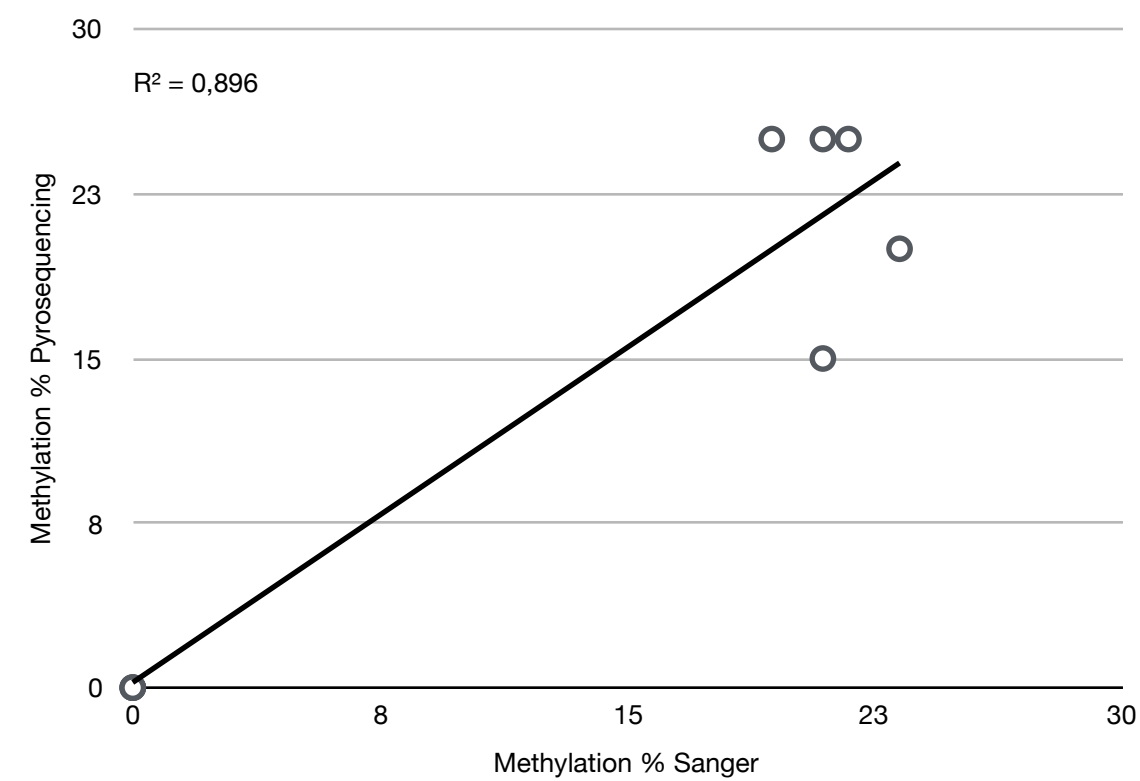

Supplement: Supplementary file 5 [file 1]

PCA in mouse at ED14.5

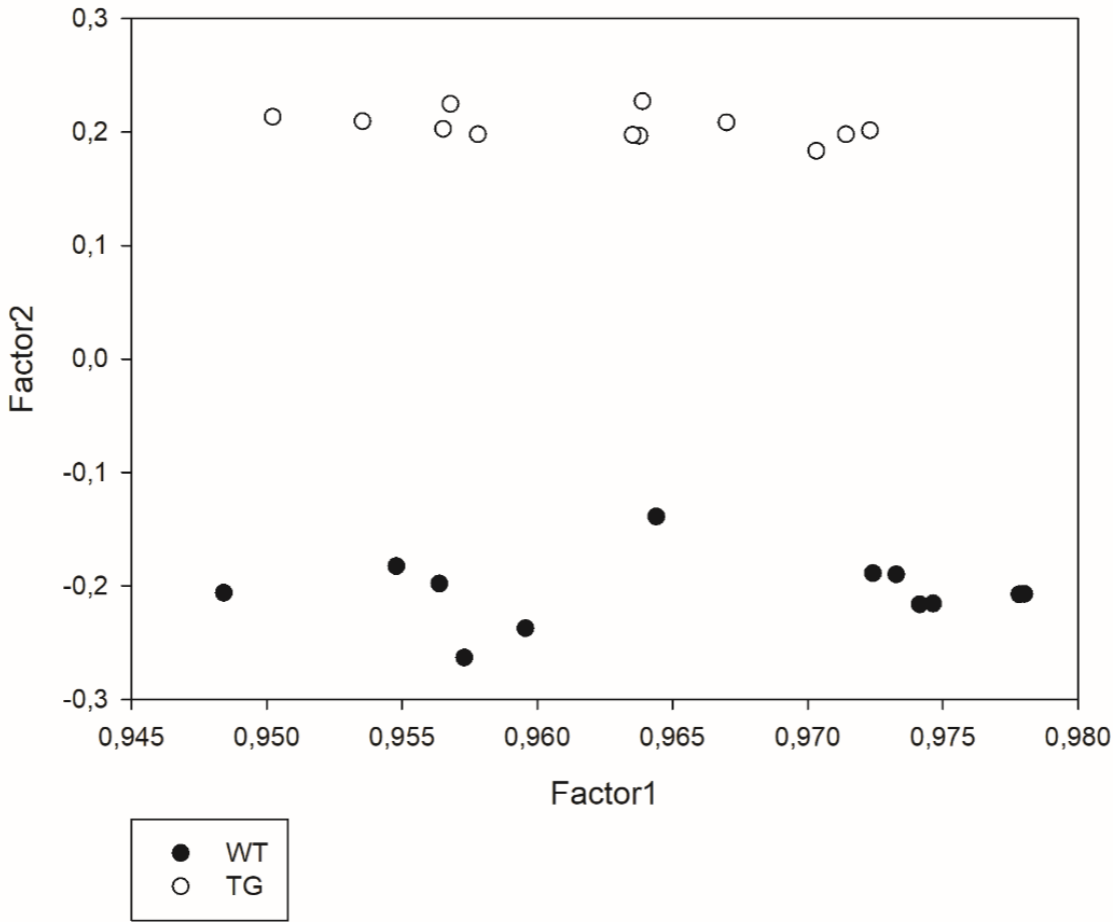

Supplement: Supplementary file 6 [file 1 › Suppl. Fig. 1.pdf]

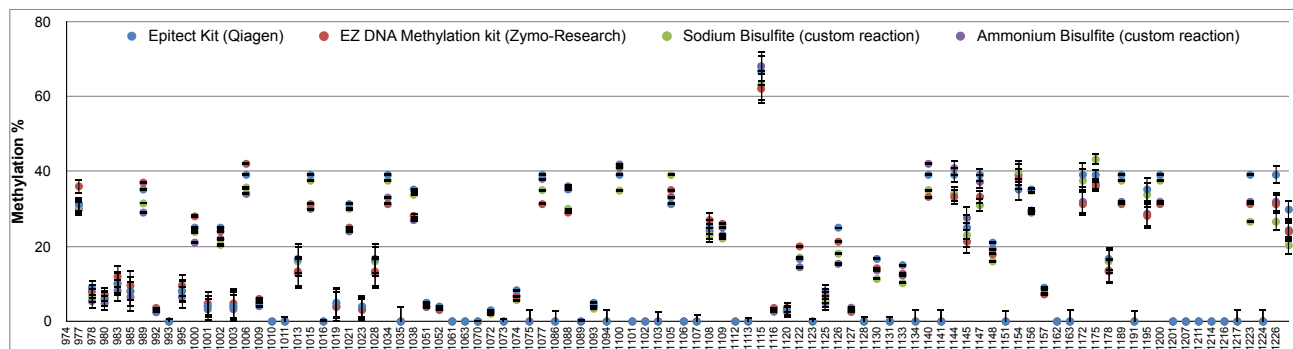

Supplement: Supplementary file 6 [file 1 › Suppl. Fig. 8.pdf]

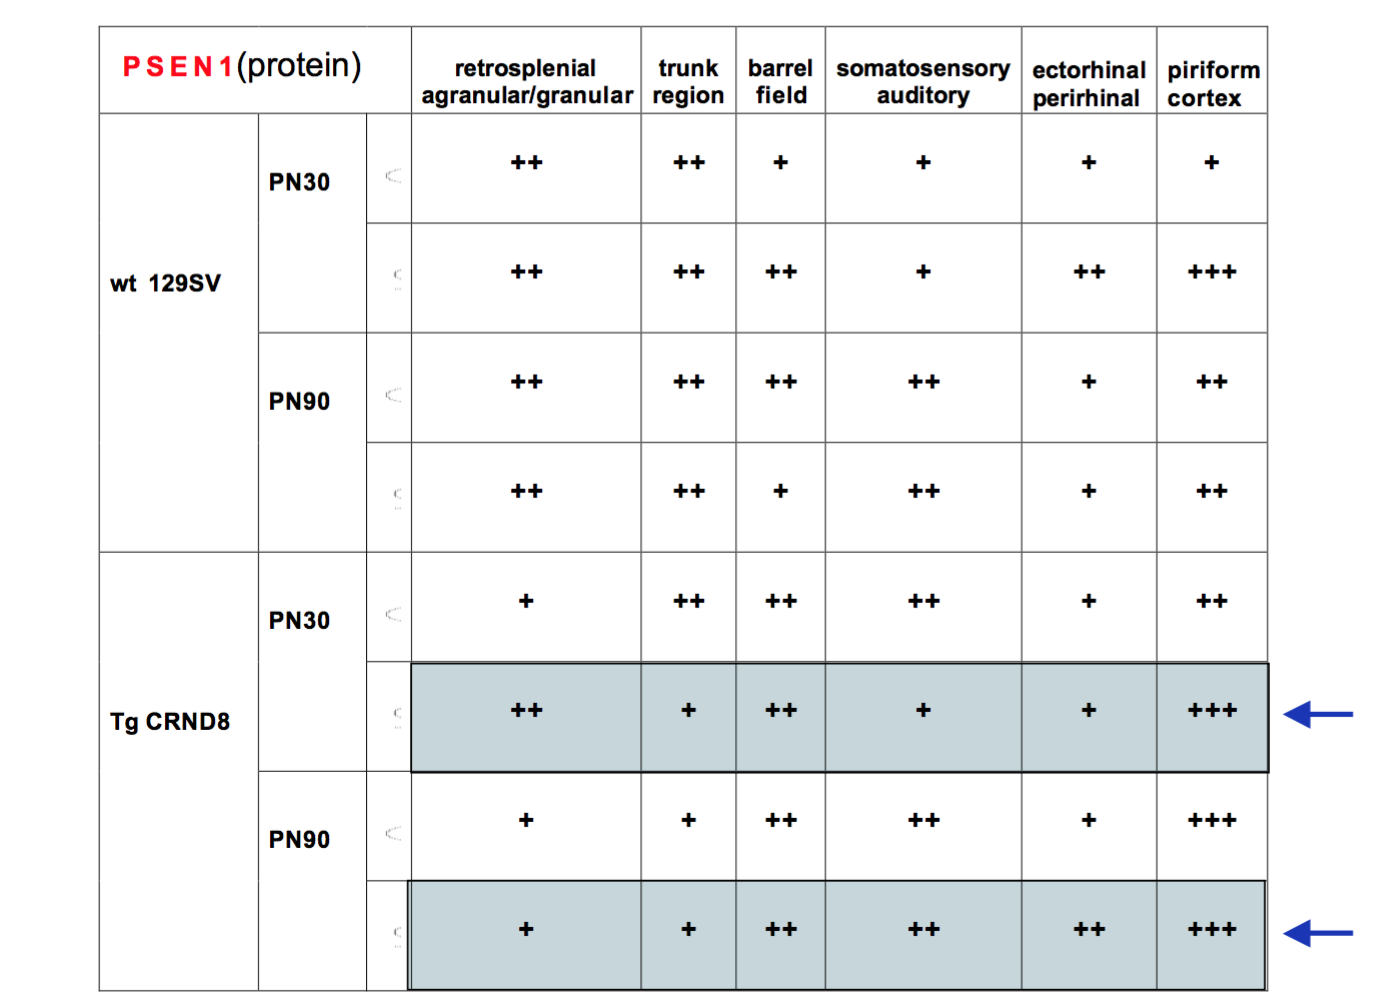

Supplement: Supplementary file 6 [file 1 › Table S1.png]
